# Supplementary material
Source: publisher site journal article supplement (https://www.spandidos-publications.com/6762/downloadSupplementary)
Supplement: Supplementary file 1 [file downloadSupplementary]

Table SI. Systemic inflammation-based prognostic scores and ratios.

| Definition                                                        | Score or ratio | (Ref.)  |
|-------------------------------------------------------------------|----------------|---------|
| Prognostic nutritional index                                      |                | (23)    |
| 10 x albumin (g/dl) + 0.005 x lymphocyte count (/dl)              | ≥45            |         |
| 10 x albumin (g/dl) + 0.005 x lymphocyte count (/dl)              | <45            |         |
| GPS                                                               |                | (20)    |
| C-reactive protein ≤1.0 (mg/dl) and albumin ≥3.5 (g/dl)           | 0              |         |
| C-reactive protein >1.0 (mg/dl) or albumin <3.5 (g/dl)            | 1              |         |
| C-reactive protein >1.0 (mg/dl) and albumin <3.5 (g/dl)           | 2              |         |
| Modified GPS                                                      |                | (25)    |
| C-reactive protein ≤0.5 (mg/dl) and albumin ≥3.5 (g/dl)           | 0              |         |
| C-reactive protein >0.5 (mg/dl) or albumin <3.5 (g/dl)            | 1              |         |
| C-reactive protein >0.5 (mg/dl) and albumin <3.5 (g/dl)           | 2              |         |
| C-reactive protein-to-albumin ratio                               |                | (26)    |
| C-reactive protein (mg/dl)/albumin (g/dl)                         | ≤0.22          |         |
| C-reactive protein (mg/dl)/albumin (g/dl)                         | >0.22          |         |
| Neutrophil-to-lymphocyte ratio, (/μl)                             |                | (21)    |
| Neutrophil count/lymphocyte count                                 | <3             |         |
| Neutrophil count/lymphocyte count                                 | ≥3-<5          |         |
| Neutrophil count/lymphocyte count                                 | ≥5             |         |
| Platelet-to-lymphocyte ratio, (/μl)                               |                | (28)    |
| Platelet count/lymphocyte count                                   | ≤150           |         |
| Platelet count/lymphocyte count                                   | >150           |         |
| Lymphocyte-to-monocyte ratio, (/μl)                               |                | (29)    |
| Lymphocyte count/monocyte count                                   | ≥2.40          |         |
| Lymphocyte count/monocyte count                                   | <2.40          |         |
| Derived NLR, (/μl)                                                |                | (30)    |
| Neutrophil count/(leukocyte count-neutrophil count)               | <3             |         |
| Neutrophil count/(leukocyte count-neutrophil count)               | ≥3-<5          |         |
| Neutrophil count/(leukocyte count-neutrophil count)               | ≥5             |         |
| Neutrophil-platelet score, (/μl)                                  |                | (31)    |
| Neutrophil count ≤7,500 and platelet count ≤400,000               | 0              |         |
| Neutrophil count >7,500 or platelet count >400,000                | 1              |         |
| Neutrophil count >7,500 and platelet count >400,000               | 2              |         |
| Neutrophil-lymphocyte score, (/μl)                                |                | (32,33) |
| Neutrophil count ≤7,500 and lymphocyte count ≥1,500               | 0              |         |
| Neutrophil count >7,500 or lymphocyte count <1,500                | 1              |         |
| Neutrophil count >7,500 and lymphocyte count <1,500               | 2              |         |
| Platelet-lymphocyte score, (/μl)                                  |                | (32,33) |
| Platelet count ≤400,000 and lymphocyte count ≥1,500               | 0              |         |
| Platelet count >400,000 or lymphocyte count <1,500                | 1              |         |
| Platelet count >400,000 and lymphocyte count <1,500               | 2              |         |
| Lymphocyte-monocyte score, (/μl)                                  |                | (32,33) |
| Lymphocyte count ≥1,500 and monocyte count ≤800                   | 0              |         |
| Lymphocyte count <1,500 or monocyte count >800                    | 1              |         |
| Lymphocyte count <1,500 and monocyte count >800                   | 2              |         |
| Prognostic index                                                  |                | (34)    |
| C-reactive protein ≤1.0 (mg/dl) and leukocyte count ≤11,000 (/μl) | 0              |         |
| C-reactive protein >1.0 (mg/dl) or leukocyte count >11,000 (/μl)  | 1              |         |
| C-reactive protein >1.0 (mg/dl) and leukocyte count >11,000 (/μl) | 2              |         |
| Systemic inflammation response index, (/μl)                       |                | (35)    |
| (Neutrophil count x 10 x platelet count)/lymphocyte count         | <300           |         |
| (Neutrophil count x 10 x platelet count)/lymphocyte count         | ≥300-<600      |         |
| (Neutrophil count x 10 x platelet count)/lymphocyte count         | ≥600-<1,000    |         |
| (Neutrophil count x 10 x platelet count)/lymphocyte count         | ≥1,000         |         |
| Systemic inflammation response index, (/μl)                       |                | (36)    |
| (Neutrophil count x monocyte count)/lymphocyte count              | <500           |         |

|                                                                      |               |      |
|----------------------------------------------------------------------|---------------|------|
| (Neutrophil count x monocyte count)/lymphocyte count                 | ≥500-<1,000   |      |
| (Neutrophil count x monocyte count)/lymphocyte count                 | ≥1,000-<2,000 |      |
| (Neutrophil count x monocyte count)/lymphocyte count                 | ≥2,000        | (37) |
| Lung immune prognostic index                                         |               |      |
| dNLR ≤3 and lactate dehydrogenase ≤245 (U/l)                         | 0             |      |
| dNLR >3 or lactate dehydrogenase >245 (U/l)                          | 1             |      |
| dNLR >3 and lactate dehydrogenase >245 (U/l)                         | 2             |      |
| C- reactive protein albumin lymphocyte index                         |               |      |
| [Albumin (g/dl) x lymphocyte count (/μl)]/C-reactive protein (mg/dl) | <5            | (38) |
| [Albumin (g/dl) x lymphocyte count (/μl)]/C-reactive protein (mg/dl) | ≥5            |      |

---

GPS, Glasgow Prognostic Score; NLR, neutrophil-to-lymphocyte ratio.

Table SII. Patients medical and demographic characteristics.

| Characteristics                                       | Value reported   |
|-------------------------------------------------------|------------------|
| Total number of patients, n                           | 159              |
| Age at start of treatment                             |                  |
| Median (range)                                        | 70 (29-87)       |
| <75 years, n (%)                                      | 120 (75.5)       |
| ≥75 years, n (%)                                      | 39 (24.5)        |
| Sex                                                   |                  |
| Male, n (%)                                           | 111 (69.8)       |
| Female, n (%)                                         | 48 (30.2)        |
| BMI                                                   |                  |
| Median (range)                                        | 18.3 (11.3-30.5) |
| <18.5, n (%)                                          | 85 (53.5)        |
| 18.5-25.0, n (%)                                      | 66 (41.5)        |
| ≥25.0, n (%)                                          | 8 (5.0)          |
| Smoking status, n (%)                                 |                  |
| Current or former                                     | 128 (80.5)       |
| Never smoked                                          | 25 (15.7)        |
| N/A                                                   | 6 (3.8)          |
| Histology, n (%)                                      |                  |
| Intestinal                                            | 65 (40.9)        |
| Diffuse                                               | 58 (36.5)        |
| Indeterminate                                         | 18 (11.3)        |
| N/A                                                   | 18 (11.3)        |
| Primary site of disease, n (%)                        |                  |
| Gastric                                               | 139 (87.4)       |
| Gastroesophageal junction                             | 20 (12.6)        |
| Clinical stage at initial diagnosis, n (%)            |                  |
| I-II                                                  | 15 (9.4)         |
| III                                                   | 44 (27.7)        |
| IV                                                    | 100 (62.9)       |
| Eastern Cooperative Oncology Group performance status |                  |
| 0                                                     | 14 (8.8)         |
| 1                                                     | 70 (44.0)        |
| ≥2                                                    | 20 (12.6)        |
| N/A                                                   | 55 (34.6)        |
| HER2 status, n (%)                                    |                  |
| Positive                                              | 30 (18.9)        |
| Negative                                              | 101 (63.5)       |
| N/A                                                   | 28 (17.6)        |
| Disease status, n (%)                                 |                  |
| Locally advanced                                      | 4 (2.5)          |
| Metastatic                                            | 100 (62.9)       |
| Recurrent                                             | 55 (34.6)        |

N/A, not available.

Table SIII. Summary of cancer treatments administered to patients.

| Cancer treatment                                                             | Value reported |
|------------------------------------------------------------------------------|----------------|
| Total number of patients, n                                                  | 159            |
| Prior surgery, n (%)                                                         |                |
| Curative                                                                     | 56 (35.2)      |
| Palliative                                                                   | 27 (17.0)      |
| None                                                                         | 76 (47.8)      |
| Prior radiotherapy, n (%)                                                    |                |
| Yes                                                                          | 8 (5.0)        |
| No                                                                           | 150 (94.4)     |
| N/A                                                                          | 1 (0.6)        |
| Number of prior systemic therapeutic regimens                                |                |
| Median (range)                                                               | 3 (1-6)        |
| ≤2                                                                           | 68 (42.8)      |
| 3                                                                            | 56 (35.2)      |
| ≥4                                                                           | 35 (22.0)      |
| Type of prior treatment regimen, n (%)                                       |                |
| Platinum                                                                     | 139 (87.4)     |
| Fluoropyrimidine                                                             | 156 (98.1)     |
| Taxane                                                                       | 145 (91.2)     |
| Irinotecan                                                                   | 25 (15.7)      |
| Ramucirumab                                                                  | 131 (82.4)     |
| Trastuzumab                                                                  | 26 (16.5)      |
| Number of subsequent systemic therapeutic regimens after nivolumab treatment |                |
| Median (range)                                                               | 0 (0-3)        |
| 0                                                                            | 125 (78.6)     |
| 1                                                                            | 25 (15.7)      |
| ≥2                                                                           | 9 (5.7)        |
| Type of sequential treatment regimen, n (%)                                  |                |
| Platinum                                                                     | 4 (2.5)        |
| Fluoropyrimidine                                                             | 7 (4.4)        |
| Taxane                                                                       | 19 (11.9)      |
| Irinotecan                                                                   | 9 (5.7)        |
| Ramucirumab                                                                  | 2 (1.3)        |
| Trastuzumab                                                                  | 1 (0.6)        |
| Trifluridine/tipiracil                                                       | 2 (1.3)        |
| Sequential radiotherapy, n (%)                                               |                |
| Yes                                                                          | 0 (0.0)        |
| No                                                                           | 159 (100)      |

Table SIV. Estimated hazard ratios and 95% CIs of prognostic factors for overall survival using univariate and multivariate Cox regression analyses.

| Prognostic factor                                     | Univariate analysis   |         | Multivariate analysis |         |
|-------------------------------------------------------|-----------------------|---------|-----------------------|---------|
|                                                       | Hazard ratio (95% CI) | P-value | Hazard ratio (95% CI) | P-value |
| Sex                                                   |                       |         |                       |         |
| Female                                                | Reference             |         | Reference             |         |
| Male                                                  | 1.025 (0.679-1.549)   | 0.907   | 1.275 (0.754-2.158)   | 0.365   |
| Age at start of first line treatment, years           |                       |         |                       |         |
| <75                                                   | Reference             |         | Reference             |         |
| ≥75                                                   | 0.792 (0.502-1.250)   | 0.316   | 0.763 (0.464-1.255)   | 0.287   |
| BMI                                                   |                       |         |                       |         |
| ≥18.5-<25.0                                           | Reference             |         | Reference             |         |
| <18.5                                                 | 0.832 (0.561-1.234)   | 0.360   | 0.894 (0.577-1.386)   | 0.616   |
| ≤25.0                                                 | 0.814 (0.323-2.051)   | 0.663   | 0.628 (0.227-1.733)   | 0.369   |
| Brinkman index                                        |                       |         |                       |         |
| <400                                                  | Reference             |         | Reference             |         |
| ≥400                                                  | 1.208 (0.686-2.127)   | 0.514   | 1.192 (0.612-2.321)   | 0.606   |
| N/A                                                   | 0.809 (0.256-2.558)   | 0.718   | 0.767 (0.227-2.590)   | 0.669   |
| Eastern Cooperative Oncology Group performance status |                       |         |                       |         |
| 0                                                     | Reference             |         | Reference             |         |
| 1                                                     | 1.034 (0.521-2.055)   | 0.923   | 1.098 (0.535-2.252)   | 0.799   |
| ≥2                                                    | 1.478 (0.663-3.293)   | 0.339   | 1.360 (0.583-3.174)   | 0.477   |
| N/A                                                   | 1.007 (0.498-2.036)   | 0.984   | 1.273 (0.595-2.723)   | 0.533   |
| Primary site of disease                               |                       |         |                       |         |
| Gastric                                               | Reference             |         | Reference             |         |
| Gastroesophageal junction                             | 0.643 (0.335-1.236)   | 0.185   | 0.627 (0.310-1.268)   | 0.193   |
| Union for International Cancer Control stage          |                       |         |                       |         |
| I-III                                                 | Reference             |         | Reference             |         |
| IV                                                    | 1.353 (0.904-2.024)   | 0.141   | 1.573 (0.876-2.825)   | 0.129   |
| Histology                                             |                       |         |                       |         |
| Intestinal                                            | Reference             |         | Reference             |         |
| Diffuse                                               | 1.167 (0.754-1.807)   | 0.488   | 1.180 (0.712-1.954)   | 0.521   |
| Intermediate                                          | 0.895 (0.449-1.781)   | 0.751   | 0.958 (0.442-2.075)   | 0.913   |
| N/A                                                   | 1.178 (0.644-2.156)   | 0.595   | 1.512 (0.729-3.134)   | 0.266   |
| HER2 status                                           |                       |         |                       |         |
| Negative                                              | Reference             |         | Reference             |         |
| Positive                                              | 0.999 (0.599-1.664)   | 0.995   | 0.994 (0.573-1.725)   | 0.984   |

|                       |                     |       |                     |       |
|-----------------------|---------------------|-------|---------------------|-------|
| N/A                   | 0.936 (0.561-1.560) | 0.800 | 1.181 (0.661-2.113) | 0.574 |
| Previous surgery      |                     |       |                     |       |
| No                    | Reference           |       | Reference           |       |
| Curative              | 0.783 (0.511-1.200) | 0.262 | 1.045 (0.578-1.888) | 0.885 |
| Palliative            | 0.896 (0.512-1.567) | 0.700 | 0.936 (0.510-1.716) | 0.829 |
| Previous radiotherapy |                     |       |                     |       |
| No                    | Reference           |       | Reference           |       |
| Yes                   | 0.326 (0.080-1.322) | 0.117 | 0.222 (0.050-0.981) | 0.047 |

---

Table SV. Concordance and AIC of each model involving each score and adjusting factors, including age, sex, location, stage and previous radiotherapy.

| Type of score                        | Concordance | AIC   | Criteria      | Patients, n | Events, n | Median overall survival, months | Hazard ratio (95% CI) | P-value |
|--------------------------------------|-------------|-------|---------------|-------------|-----------|---------------------------------|-----------------------|---------|
| Modified GPS                         | 0.713       | 5.565 | 0             | 35          | 12        | N/A                             | Reference             |         |
|                                      |             |       | 1             | 55          | 40        | 132                             | 3.277 (1.684-6.379)   | <0.001  |
|                                      |             |       | 2             | 53          | 41        | 83                              | 5.601 (2.903-10.807)  | <0.001  |
| GPS                                  | 0.700       | 5.580 | 0             | 41          | 16        | 305                             | Reference             |         |
|                                      |             |       | 1             | 60          | 43        | 116                             | 2.548 (1.415-4.548)   | 0.002   |
|                                      |             |       | 2             | 42          | 34        | 64                              | 5.092 (2.776-9.342)   | <0.001  |
| C-reactive protein-to-albumin ratio  | 0.679       | 5.619 | ≤0.22         | 79          | 42        | 241                             | Reference             |         |
|                                      |             |       | >0.22         | 64          | 51        | 98                              | 2.754 (1.810-4.192)   | <0.001  |
| Lung immune prognostic index         | 0.677       | 5.629 | 0             | 73          | 39        | 177                             | Reference             |         |
|                                      |             |       | 1             | 62          | 53        | 75                              | 2.765 (1.798-4.253)   | <0.001  |
|                                      |             |       | 2             | 11          | 7         | 103                             | 2.165 (0.944-4.964)   | 0.068   |
| Systemic inflammation response index | 0.672       | 5.642 | <500          | 30          | 15        | N/A                             | Reference             |         |
|                                      |             |       | ≥500-<1,000   | 33          | 17        | 223                             | 1.141 (0.565-2.305)   | 0.713   |
|                                      |             |       | ≥1,000-<2,000 | 33          | 26        | 106                             | 2.738 (1.414-5.301)   | 0.003   |
|                                      |             |       | ≥2,000        | 42          | 34        | 94                              | 3.286 (1.755-6.154)   | <0.001  |
| Prognostic index                     | 0.669       | 5.653 | 0             | 50          | 49        | 217                             | Reference             |         |
|                                      |             |       | 1             | 45          | 37        | 95                              | 2.522 (1.623-3.919)   | <0.001  |
|                                      |             |       | 2             | 12          | 10        | 71                              | 2.589 (1.287-5.205)   | 0.008   |
| Platelet-to-lymphocyte ratio         | 0.669       | 5.713 | ≤150          | 60          | 35        | 223                             | Reference             |         |
|                                      |             |       | >150          | 85          | 62        | 126                             | 1.780 (1.152-2.751)   | 0.009   |
| Prognostic nutritional index         | 0.667       | 5.622 | ≥45           | 28          | 9         | N/A                             | Reference             |         |
|                                      |             |       | <45           | 116         | 84        | 122                             | 3.986 (1.978-8.031)   | <0.001  |
|                                      |             |       | <3            | 114         | 70        | 163                             | Reference             |         |
| Derived NLR                          | 0.661       | 5.674 | ≥3-<5         | 23          | 18        | 94                              | 2.662 (1.539-4.606)   | <0.001  |
|                                      |             |       | ≥5            | 12          | 11        | 45                              | 2.557 (1.317-4.964)   | 0.006   |
|                                      |             |       | <300          | 33          | 17        | N/A                             | Reference             |         |
| Systemic immune-inflammation index   | 0.656       | 5.706 | ≥300-<600     | 35          | 22        | 209                             | 1.677 (0.881-3.192)   | 0.115   |
|                                      |             |       | ≥600-<1,000   | 27          | 20        | 138                             | 2.097 (1.089-4.040)   | 0.027   |
|                                      |             |       | ≥1,000        | 43          | 33        | 106                             | 2.800 (1.531-5.119)   | <0.001  |
|                                      |             |       | <3            | 74          | 41        | 241                             | Reference             |         |
| NLR                                  | 0.654       | 5.661 | ≥3-<5         | 37          | 28        | 106                             | 2.454 (1.467-4.108)   | 0.001   |
|                                      |             |       | ≥5            | 27          | 23        | 103                             | 2.554 (1.515-4.108)   | <0.001  |
| Neutrophil-platelet score            | 0.637       | 5.715 | 0             | 126         | 80        | 177                             | Reference             |         |

|                                             |       |       |       |     |    |     |                     |       |
|---------------------------------------------|-------|-------|-------|-----|----|-----|---------------------|-------|
|                                             |       |       | 1     | 18  | 15 | 122 | 1.833 (1.043-3.221) | 0.035 |
|                                             |       |       | 2     | 6   | 5  | 71  | 3.494 (1.356-9.007) | 0.010 |
| C-reactive protein albumin lymphocyte index | 0.636 | 5.724 | <5    | 110 | 71 | 138 | Reference           |       |
|                                             |       |       | ≥5    | 29  | 23 | 109 | 1.823 (1.127-2.949) | 0.015 |
|                                             |       |       | 0     | 48  | 29 | 209 | Reference           |       |
| Neutrophil-lymphocyte score                 | 0.631 | 5.737 | 1     | 81  | 55 | 126 | 1.464 (0.921-2.328) | 0.107 |
|                                             |       |       | 2     | 9   | 8  | 122 | 2.570 (1.145-5.767) | 0.022 |
|                                             |       |       | 0     | 51  | 32 | 183 | Reference           |       |
| Lymphocyte-monocyte score                   | 0.628 | 5.745 | 1     | 88  | 60 | 125 | 1.418 (0.911-2.208) | 0.122 |
|                                             |       |       | 2     | 6   | 5  | 135 | 2.254 (0.843-6.028) | 0.106 |
|                                             |       |       | ≥2.40 | 97  | 58 | 183 | Reference           |       |
| Lymphocyte-to-monocyte ratio                | 0.625 | 5.697 | <2.40 | 48  | 39 | 98  | 2.000 (1.301-3.080) | 0.002 |
|                                             |       |       | 0     | 51  | 32 | 197 | Reference           |       |
| Platelet-lymphocyte score                   | 0.621 | 5.752 | 1     | 87  | 61 | 125 | 1.452 (0.935-2.256) | 0.100 |
|                                             |       |       | 2     | 7   | 4  | 230 | 1.329 (0.457-3.865) | 0.602 |

AIC, Akaike information criterion; GPS, Glasgow prognostic score; NLR, neutrophil-to-lymphocyte ratio.

Table SVI. Concordance and Akaike information criterion of each score for time to treatment failure.

| Type of score                               | Concordance | AIC   |
|---------------------------------------------|-------------|-------|
| Modified GPS                                | 0.603       | 8.128 |
| GPS                                         | 0.595       | 8.152 |
| C-reactive protein-to-albumin ratio         | 0.578       | 8.164 |
| Lung immune prognostic index                | 0.589       | 8.125 |
| Systemic inflammation response index        | 0.575       | 8.186 |
| Prognostic index                            | 0.548       | 8.192 |
| Platelet-to-lymphocyte ratio                | 0.532       | 8.178 |
| Prognostic nutritional index                | 0.573       | 8.151 |
| NLR                                         | 0.564       | 8.18  |
| Systemic immune-inflammation index          | 0.56        | 8.191 |
| Derived NLR                                 | 0.576       | 8.161 |
| Neutrophil-platelet score                   | 0.51        | 8.194 |
| C-reactive protein albumin lymphocyte index | 0.56        | 8.155 |
| Neutrophil-lymphocyte score                 | 0.544       | 8.199 |
| Lymphocyte-monocyte score                   | 0.545       | 8.202 |
| Lymphocyte-to-monocyte ratio                | 0.525       | 8.188 |
| Platelet-lymphocyte score                   | 0.539       | 8.202 |

GPS, Glasgow prognostic score; NLR, neutrophil-to-lymphocyte ratio.
